# Supplementary material for: A highly stable l-alanine-based mono(aquated) Mn(ii) complex as a T1-weighted MRI contrast agent
Source: Royal Society of Chemistry journal article supplement (doi:10.1039/c7dt02282d), 2017-01-01
Supplement: c7dt02282d1.pdf [file c7dt02282d1.pdf]

## A Highly Stable Alanine Based Mono(aquated) Mn(II) Complex as $T_1$ -weighted MRI Contrast Agent

Mahmuda Khannam,<sup>a</sup> Thomas Weyhermüller,<sup>b</sup> Upashi Goswami<sup>c</sup> and Chandan Mukherjee\*<sup>a</sup>

**\*Corresponding address:**

Dr. Chandan Mukherjee, Department of Chemistry, Indian Institute of Technology Guwahati, Guwahati, 781039, Assam, India

Email: [cmukherjee@iitg.ernet.in](mailto:cmukherjee@iitg.ernet.in)

Phone No. +91-361-258-2327

Fax: +91-361-258-2349

| <b>Contents</b>                                                             | <b>Page</b> |
|-----------------------------------------------------------------------------|-------------|
| <sup>1</sup> H and <sup>13</sup> C NMR plot for ligand Li <sub>3</sub> cbda | S3          |
| ESI-MS plot and HPLC chromatogram for ligand Li <sub>3</sub> cbda           | S4          |
| ESI-MS (-ve) plot for complex <b>1</b>                                      | S5          |
| FTIR spectrum of ligand Li <sub>3</sub> cbda                                | S5          |
| FTIR spectrum of complex <b>1</b>                                           | S6          |
| Competition titration of ligand with EDTA                                   | S6-S7       |
| <i>T</i> <sub>1</sub> -weighted image intensity plot at 1.5 T               | S7          |

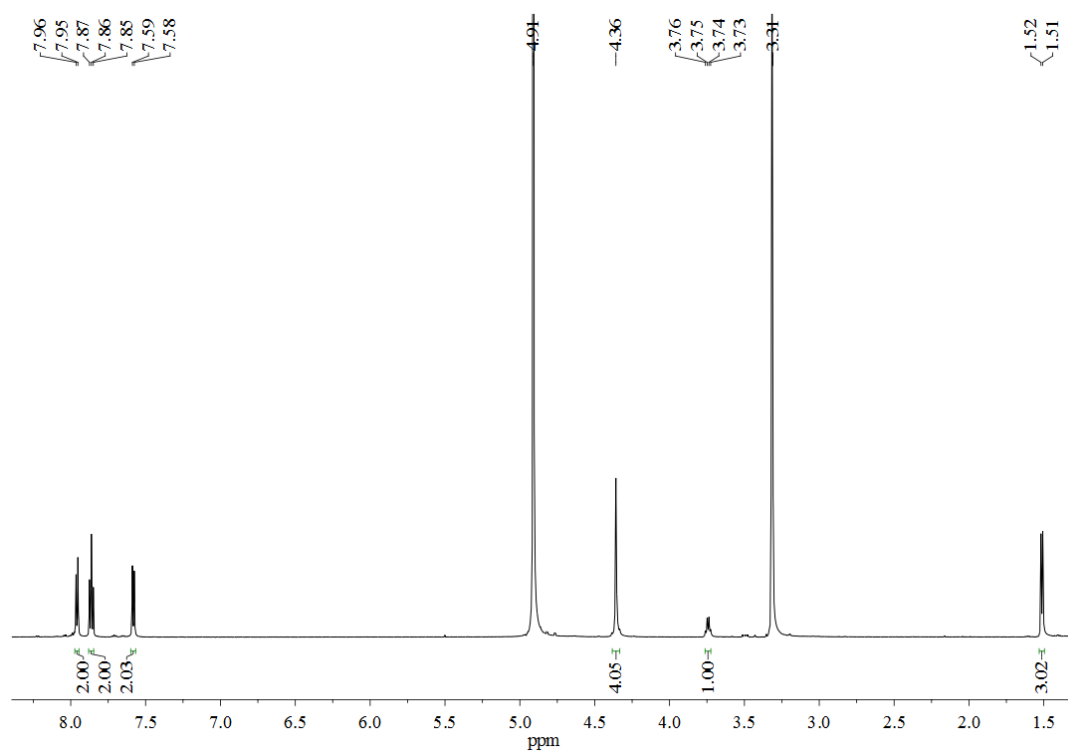

**Figure S1.**  $^1\text{H}$  NMR spectrum for ligand  $\text{Li}_3\text{cbda}$  in  $\text{CD}_3\text{OD}$  solvent.

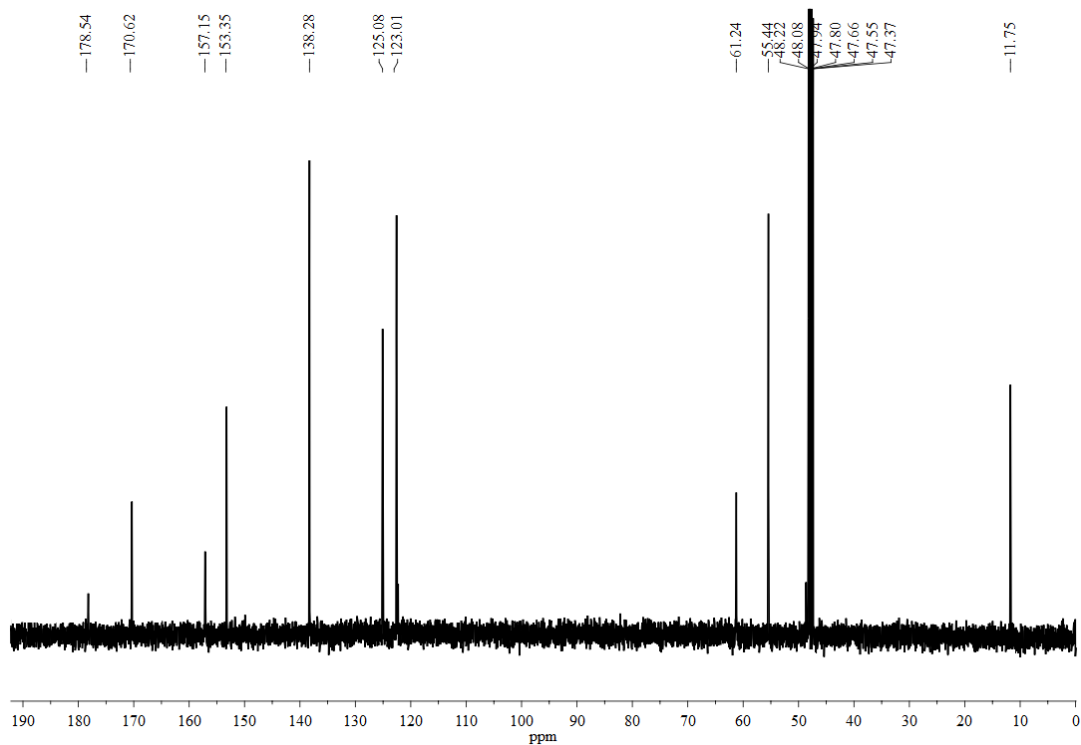

**Figure S2.**  $^{13}\text{C}$  NMR spectrum for ligand  $\text{Li}_3\text{cbda}$  in  $\text{CD}_3\text{OD}$  solvent.

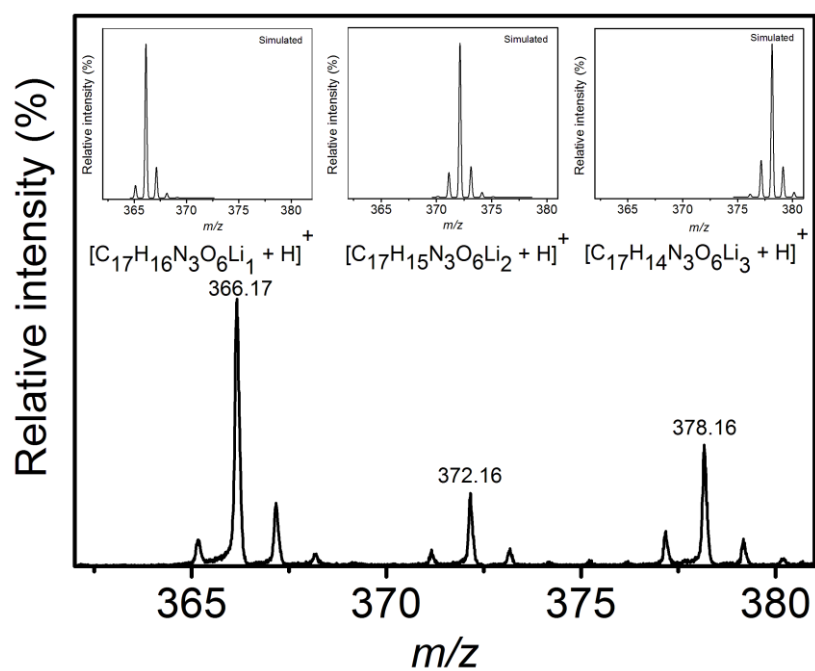

**Figure S3.** ESI-MS (+ve) mass spectrum of aqueous solution of ligand  $\text{Li}_3\text{cbda}$ . Simulated spectra have been given as inset.

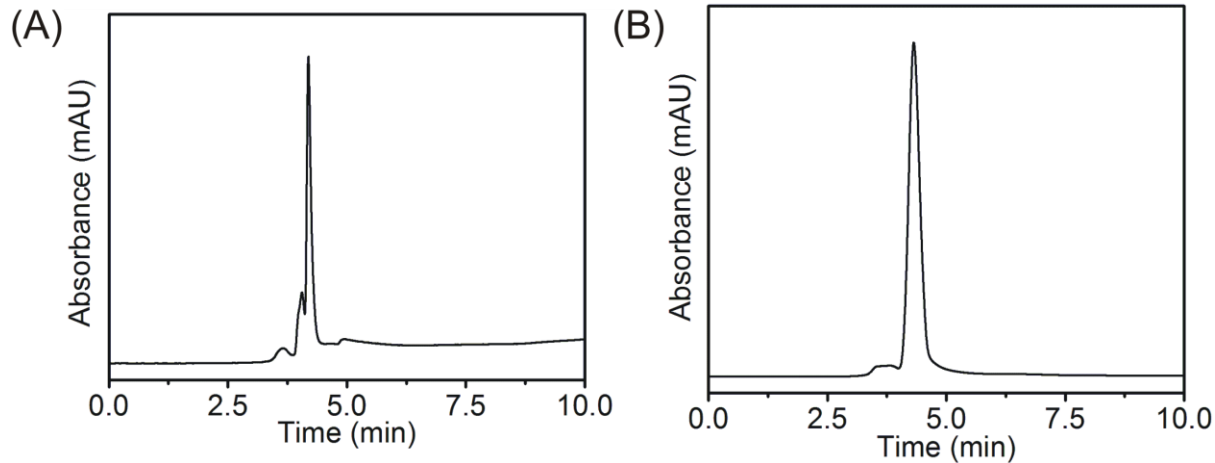

**Figure S4.** HPLC chromatograms of: (A) aqueous solution of the isolated ligand; (B) aqueous solution of the species obtained after 24 h stirring of the ligand in the presence of 3 equivalents of  $\text{LiOH}$  in water.

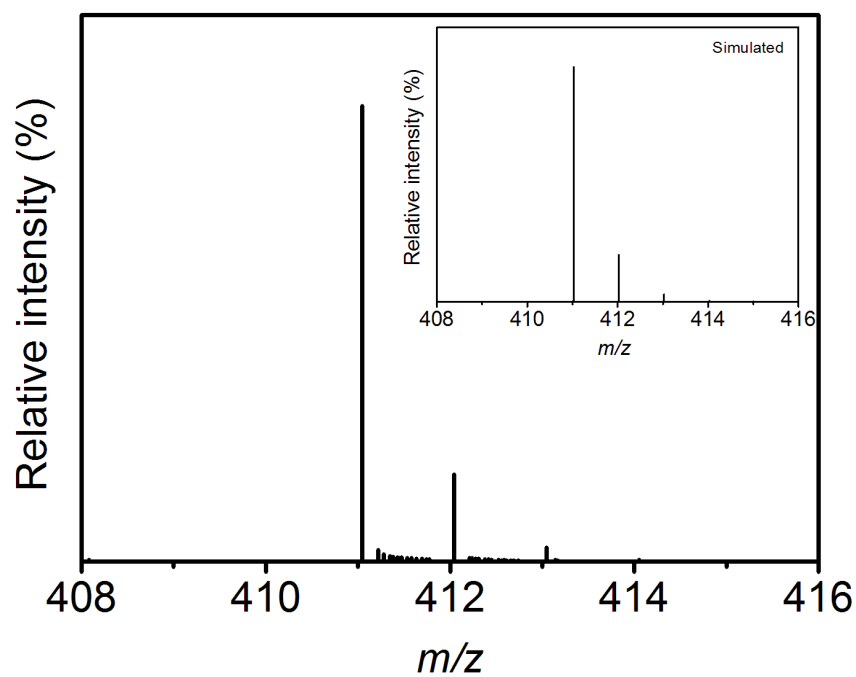

**Figure S5.** ESI-MS (–ve) mass spectrum of complex **1**. Simulated spectrum has been given as inset.

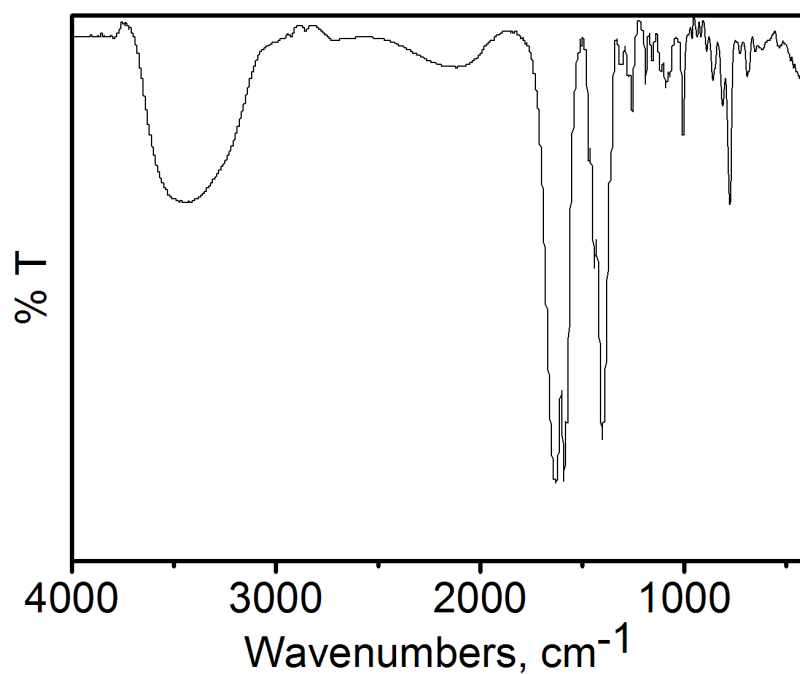

**Figure S6.** FTIR spectrum of ligand  $\text{Li}_3\text{cbda}$ .

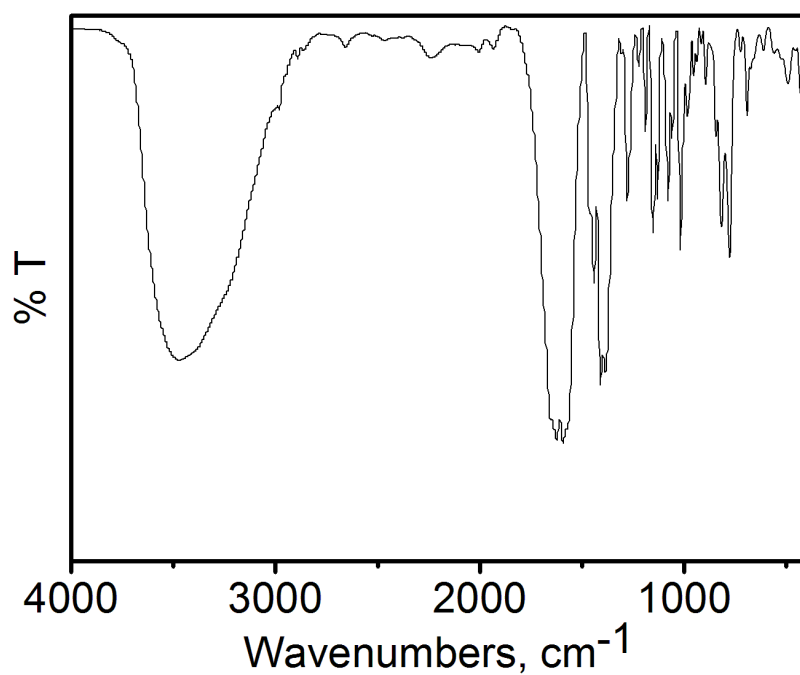

**Figure S7.** FTIR spectrum of complex **1**.

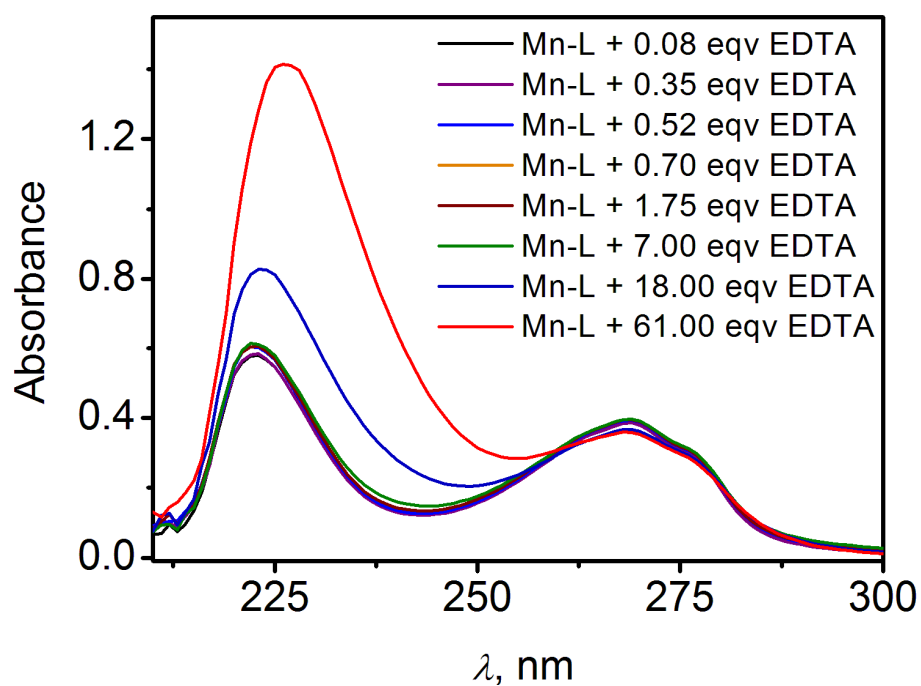

**Figure S8.** UV-Vis spectral changes during competitive study for determining pMn value for ligand Li<sub>3</sub>cbda (where, L = Li<sub>3</sub>cbda) against EDTA.

### Competition titration with Na<sub>2</sub>H<sub>2</sub>EDTA:

The general procedure used to determine the pMn value for complex **1** was by competition titration method. Varying volumes of standardized EDTA stock solution were added to solutions containing constant concentration of ligand (Li<sub>3</sub>cbda) and Mn(II) ion. The pH of all solutions was maintained at 7.4 by preparing all solutions in 10 mM HEPES buffer. All the solutions were kept for 24 hours to attain the thermodynamic equilibrium. The concentration of free and complexed ligand in each solution was determined from absorbance spectra considering a particular range of wavelength where spectral changes occurred. With respect to the absorbance of Li<sub>3</sub>cbda, we determined the variation of absorbance values for each solution set which on further calculations gave the concentrations of Mn<sub>2</sub>cbda complex, MnEDTA complex, free Li<sub>3</sub>cbda and free Na<sub>2</sub>H<sub>2</sub>EDTA for each set. Then we plotted the logarithm values of respective ratios for MnEDTA to Mn<sub>2</sub>cbda complex concentrations against logarithm of ratios for free Na<sub>2</sub>H<sub>2</sub>EDTA to free Li<sub>3</sub>cbda concentrations for each set of samples. From the linear plot pMn value for the ligand Li<sub>3</sub>cbda was calculated as its x-intercept value based on the equation given below.

$$\log ([\text{MnEDTA}]/[\text{Mn}_{2}\text{cbda}]) = \Delta\text{pM} + \log ([\text{Na}_{2}\text{H}_{2}\text{EDTA}]/[\text{Li}_{3}\text{cbda}])$$

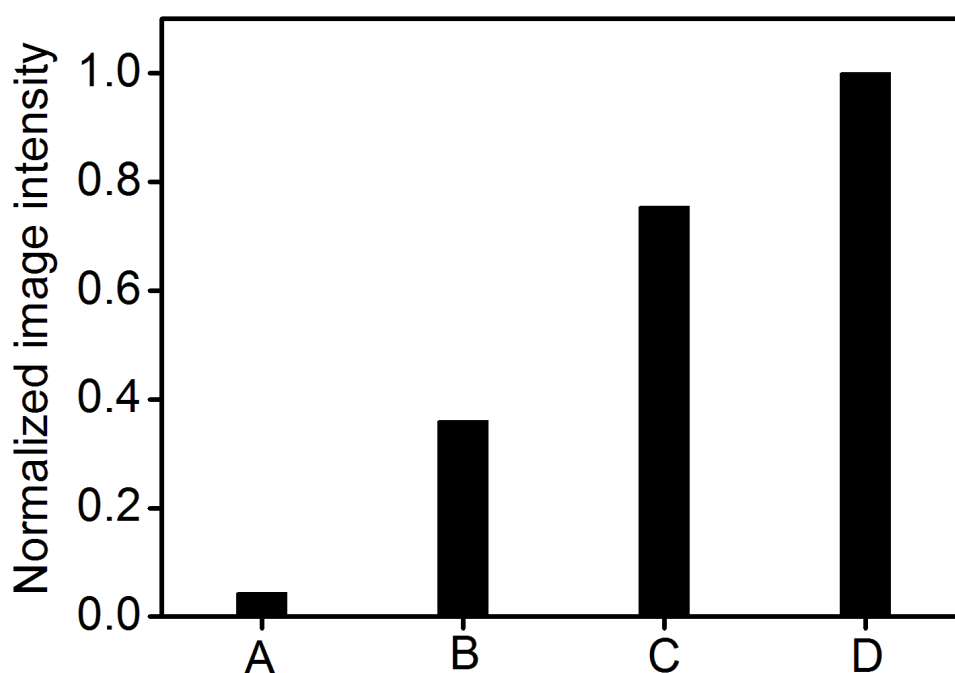

**Figure S9.**  $T_1$ -weighted image intensity plot for complex **1** at 1.5 T; where A = 0.25 mM, B = 0.50 mM, C = 0.70 mM, D = 1.00 mM concentrations of the aqueous solution of the complex at pH ~ 7.4 and 25 °C.
